# Supplementary material for: The TaGSK1, TaSRG, TaPTF1, and TaP5CS Gene Transcripts Confirm Salinity Tolerance by Increasing Proline Production in Wheat (Triticum aestivum L.)
Source: MDPI journal article supplement (doi:10.3390/plants11233401), 2022-12-06
Supplement: s1 [file s1]

**Table S1.** Three-way analysis of variance (ANOVA) tables, \*\*\* significant at  $p < 0.001$ .

|                 |              |     |     |          |           |                  |       |
|-----------------|--------------|-----|-----|----------|-----------|------------------|-------|
| <i>TaPTFI</i>   | Effect       | Dfn | DFd | F        | <i>p</i>  | <i>p</i> < 0.001 | ges   |
|                 | Time (T)     | 2   | 144 | 1853.47  | 1.74E-103 | ***              | 0.963 |
|                 | Salt (S)     | 3   | 144 | 1256.525 | 5.15E-103 | ***              | 0.963 |
|                 | Genotype (G) | 5   | 144 | 1574.685 | 9.41E-124 | ***              | 0.982 |
|                 | T x S        | 6   | 144 | 355.62   | 1.09E-83  | ***              | 0.937 |
|                 | T x G        | 10  | 144 | 731.449  | 4.43E-118 | ***              | 0.981 |
|                 | S x G        | 15  | 144 | 306.834  | 3.63E-101 | ***              | 0.97  |
|                 | T x S x G    | 30  | 144 | 88.714   | 3.07E-78  | ***              | 0.949 |
| <i>TaDHN</i>    | Effect       | Dfn | DFd | F        | <i>p</i>  | <i>p</i> < 0.001 | ges   |
|                 | Time (T)     | 2   | 144 | 85.899   | 2.78E-25  | ***              | 0.544 |
|                 | Salt (S)     | 3   | 144 | 144.151  | 3.54E-43  | ***              | 0.75  |
|                 | Genotype (G) | 5   | 144 | 1414.29  | 1.85E-120 | ***              | 0.98  |
|                 | T x S        | 6   | 144 | 141.287  | 9.11E-58  | ***              | 0.855 |
|                 | T x G        | 10  | 144 | 659.719  | 6.37E-115 | ***              | 0.979 |
|                 | S x G        | 15  | 144 | 161.354  | 5.47E-82  | ***              | 0.944 |
|                 | T x S x G    | 30  | 144 | 69.684   | 3.30E-71  | ***              | 0.936 |
| <i>TaSRG</i>    | Effect       | Dfn | DFd | F        | <i>p</i>  | <i>p</i> < 0.001 | ges   |
|                 | Time (T)     | 2   | 144 | 306.174  | 1.36E-52  | ***              | 0.81  |
|                 | Salt (S)     | 3   | 144 | 227.479  | 2.02E-54  | ***              | 0.826 |
|                 | Genotype (G) | 5   | 144 | 460.853  | 1.09E-86  | ***              | 0.941 |
|                 | T x S        | 6   | 144 | 87.221   | 1.88E-45  | ***              | 0.784 |
|                 | T x G        | 10  | 144 | 308.845  | 5.57E-92  | ***              | 0.955 |
|                 | S x G        | 15  | 144 | 67.368   | 3.03E-57  | ***              | 0.875 |
|                 | T x S x G    | 30  | 144 | 79.162   | 6.60E-75  | ***              | 0.943 |
| <i>TaSC</i>     | Effect       | Dfn | DFd | F        | <i>p</i>  | <i>p</i> < 0.001 | ges   |
|                 | Time (T)     | 2   | 144 | 872.593  | 3.24E-81  | ***              | 0.924 |
|                 | Salt (S)     | 3   | 144 | 332.648  | 1.61E-64  | ***              | 0.874 |
|                 | Genotype (G) | 5   | 144 | 1800.977 | 7.03E-128 | ***              | 0.984 |
|                 | T x S        | 6   | 144 | 114.005  | 3.72E-52  | ***              | 0.826 |
|                 | T x G        | 10  | 144 | 103.365  | 1.49E-60  | ***              | 0.878 |
|                 | S x G        | 15  | 144 | 24.025   | 6.51E-32  | ***              | 0.715 |
|                 | T x S x G    | 30  | 144 | 35.224   | 3.75E-52  | ***              | 0.88  |
| <i>TaPIMP1</i>  | Effect       | Dfn | DFd | F        | <i>p</i>  | <i>p</i> < 0.001 | ges   |
|                 | Time (T)     | 2   | 144 | 1050.396 | 1.31E-86  | ***              | 0.936 |
|                 | Salt (S)     | 3   | 144 | 321.544  | 1.35E-63  | ***              | 0.87  |
|                 | Genotype (G) | 5   | 144 | 539.95   | 2.30E-91  | ***              | 0.949 |
|                 | T x S        | 6   | 144 | 128.495  | 2.92E-55  | ***              | 0.843 |
|                 | T x G        | 10  | 144 | 393.04   | 3.34E-99  | ***              | 0.965 |
|                 | S x G        | 15  | 144 | 147.978  | 1.87E-79  | ***              | 0.939 |
|                 | T x S x G    | 30  | 144 | 179.773  | 2.42E-99  | ***              | 0.974 |
| Proline         | Effect       | Dfn | DFd | F        | <i>p</i>  | <i>p</i> < 0.001 | ges   |
|                 | Time (T)     | 2   | 144 | 1050.396 | 1.31E-86  | ***              | 0.936 |
|                 | Salt (S)     | 3   | 144 | 321.544  | 1.35E-63  | ***              | 0.87  |
|                 | Genotype (G) | 5   | 144 | 539.95   | 2.30E-91  | ***              | 0.949 |
|                 | T x S        | 6   | 144 | 128.495  | 2.92E-55  | ***              | 0.843 |
|                 | T x G        | 10  | 144 | 393.04   | 3.34E-99  | ***              | 0.965 |
|                 | S x G        | 15  | 144 | 147.978  | 1.87E-79  | ***              | 0.939 |
|                 | T x S x G    | 30  | 144 | 179.773  | 2.42E-99  | ***              | 0.974 |
| <i>TaMIP</i>    | Effect       | Dfn | DFd | F        | <i>p</i>  | <i>p</i> < 0.001 | ges   |
|                 | Time (T)     | 2   | 144 | 979.914  | 1.40E-84  | ***              | 0.932 |
|                 | Salt (S)     | 3   | 144 | 82.288   | 4.59E-31  | ***              | 0.632 |
|                 | Genotype (G) | 5   | 144 | 2027.243 | 1.59E-131 | ***              | 0.986 |
|                 | T x S        | 6   | 144 | 77.481   | 1.31E-42  | ***              | 0.764 |
|                 | T x G        | 10  | 144 | 341.972  | 5.04E-95  | ***              | 0.96  |
|                 | S x G        | 15  | 144 | 76.695   | 8.86E-61  | ***              | 0.889 |
|                 | T x S x G    | 30  | 144 | 80.909   | 1.52E-75  | ***              | 0.944 |
| <i>TaHKT1;4</i> | Effect       | Dfn | DFd | F        | <i>p</i>  | <i>p</i> < 0.001 | ges   |
|                 | Time (T)     | 2   | 144 | 1219.965 | 5.22E-91  | ***              | 0.944 |
|                 | Salt (S)     | 3   | 144 | 10.562   | 2.54E-06  | ***              | 0.18  |
|                 | Genotype (G) | 5   | 144 | 419.262  | 6.47E-84  | ***              | 0.936 |
|                 | T x S        | 6   | 144 | 10.169   | 2.29E-09  | ***              | 0.298 |
|                 | T x G        | 10  | 144 | 189.227  | 1.41E-77  | ***              | 0.929 |
|                 | S x G        | 15  | 144 | 3.358    | 7.47E-05  | ***              | 0.259 |
|                 | T x S x G    | 30  | 144 | 2.903    | 1.24E-05  | ***              | 0.377 |
| <i>TaGSK1</i>   | Effect       | Dfn | DFd | F        | <i>p</i>  | <i>p</i> < 0.001 | ges   |
|                 | Time (T)     | 2   | 144 | 96.374   | 2.73E-27  | ***              | 0.572 |
|                 | Salt (S)     | 3   | 144 | 220.321  | 1.34E-53  | ***              | 0.821 |
|                 | Genotype (G) | 5   | 144 | 383.828  | 2.42E-81  | ***              | 0.93  |
|                 | T x S        | 6   | 144 | 140.368  | 1.36E-57  | ***              | 0.854 |
|                 | T x G        | 10  | 144 | 240.059  | 1.61E-84  | ***              | 0.943 |
|                 | S x G        | 15  | 144 | 40.543   | 4.58E-44  | ***              | 0.809 |
|                 | T x S x G    | 30  | 144 | 44.955   | 8.44E-59  | ***              | 0.904 |
| <i>TaP5CS</i>   | Effect       | Dfn | DFd | F        | <i>p</i>  | <i>p</i> < 0.001 | ges   |
|                 | Time (T)     | 2   | 144 | 780.821  | 5.08E-78  | ***              | 0.916 |
|                 | Salt (S)     | 3   | 144 | 72.612   | 1.16E-28  | ***              | 0.602 |
|                 | Genotype (G) | 5   | 144 | 284.906  | 8.68E-73  | ***              | 0.908 |
|                 | T x S        | 6   | 144 | 92.669   | 6.15E-47  | ***              | 0.794 |
|                 | T x G        | 10  | 144 | 227.716  | 5.70E-83  | ***              | 0.941 |
|                 | S x G        | 15  | 144 | 111.39   | 3.01E-71  | ***              | 0.921 |
|                 | T x S x G    | 30  | 144 | 84.052   | 1.17E-76  | ***              | 0.946 |
| <i>TaMYB</i>    | Effect       | Dfn | DFd | F        | <i>p</i>  | <i>p</i> < 0.001 | ges   |
|                 | Time (T)     | 2   | 144 | 269.011  | 2.34E-49  | ***              | 0.789 |
|                 | Salt (S)     | 3   | 144 | 288.914  | 1.04E-60  | ***              | 0.858 |
|                 | Genotype (G) | 5   | 144 | 590.295  | 5.16E-94  | ***              | 0.953 |
|                 | T x S        | 6   | 144 | 102.805  | 1.59E-49  | ***              | 0.811 |
|                 | T x G        | 10  | 144 | 262.056  | 4.18E-87  | ***              | 0.948 |
|                 | S x G        | 15  | 144 | 43.266   | 1.10E-45  | ***              | 0.818 |
|                 | T x S x G    | 30  | 144 | 25.232   | 1.90E-43  | ***              | 0.84  |
