# Supplementary material for: The TaGSK1, TaSRG, TaPTF1, and TaP5CS Gene Transcripts Confirm Salinity Tolerance by Increasing Proline Production in Wheat (Triticum aestivum L.)
Source: MDPI journal article supplement (doi:10.3390/plants11233401), 2022-12-06
Supplement: s1 [file s1]

**Table S3.** Loading values and percentage contribution of variables on the axis identified by the principal component analysis (PCA) for all cultivars under control and saline conditions.

| Variable        | Dim. 1         |                              |                           | Dim. 2         |                              |                           | Dim. 3         |                              |                           |
|-----------------|----------------|------------------------------|---------------------------|----------------|------------------------------|---------------------------|----------------|------------------------------|---------------------------|
|                 | Loading values | Contribution of variable (%) | Quality of representation | Loading values | Contribution of variable (%) | Quality of representation | Loading values | Contribution of variable (%) | Quality of representation |
| TaPTF1 0 h      | 5.271          | 0.754                        | 0.568                     | 1.742          | 0.280                        | 0.078                     | 0.051          | -0.041                       | 0.002                     |
| TaPTF1 12 h     | 3.234          | -0.590                       | 0.348                     | 9.522          | 0.655                        | 0.429                     | 0.475          | 0.125                        | 0.016                     |
| TaPTF1 24 h     | 3.458          | -0.610                       | 0.373                     | 8.748          | 0.628                        | 0.394                     | 0.002          | -0.007                       | 0.000                     |
| TaDHN 0 h       | 5.060          | 0.738                        | 0.545                     | 0.012          | 0.023                        | 0.001                     | 7.475          | -0.497                       | 0.247                     |
| TaDHN 12 h      | 0.212          | -0.151                       | 0.023                     | 0.453          | -0.143                       | 0.020                     | 9.457          | -0.559                       | 0.312                     |
| TaDHN 24 h      | 1.559          | 0.410                        | 0.168                     | 2.664          | 0.346                        | 0.120                     | 1.246          | -0.203                       | 0.041                     |
| TaSRG 0 h       | 1.173          | 0.356                        | 0.126                     | 0.020          | -0.030                       | 0.001                     | 14.654         | 0.695                        | 0.484                     |
| TaSRG 12 h      | 0.000          | 0.002                        | 0.000                     | 3.266          | 0.384                        | 0.147                     | 4.616          | -0.390                       | 0.152                     |
| TaSRG 24 h      | 0.275          | 0.172                        | 0.030                     | 13.202         | 0.771                        | 0.595                     | 0.019          | -0.025                       | 0.001                     |
| TaSC 0 h        | 6.814          | 0.857                        | 0.734                     | 0.007          | 0.018                        | 0.000                     | 4.861          | 0.400                        | 0.160                     |
| TaSC 12 h       | 6.151          | 0.814                        | 0.663                     | 0.025          | 0.034                        | 0.001                     | 0.892          | -0.172                       | 0.029                     |
| TaSC 24 h       | 6.770          | 0.854                        | 0.729                     | 0.812          | 0.191                        | 0.037                     | 0.914          | -0.174                       | 0.030                     |
| TaPIMP1 0 h     | 6.638          | 0.846                        | 0.715                     | 0.549          | -0.157                       | 0.025                     | 3.711          | 0.350                        | 0.122                     |
| TaPIMP1 12 h    | 2.025          | 0.467                        | 0.218                     | 2.015          | 0.301                        | 0.091                     | 8.752          | -0.537                       | 0.289                     |
| TaPIMP1 24 h    | 0.968          | 0.323                        | 0.104                     | 7.575          | 0.584                        | 0.341                     | 5.496          | 0.426                        | 0.181                     |
| TaMIP 0 h       | 6.620          | 0.845                        | 0.713                     | 0.578          | -0.161                       | 0.026                     | 5.844          | -0.439                       | 0.193                     |
| TaMIP 12 h      | 5.493          | 0.769                        | 0.592                     | 0.882          | 0.199                        | 0.040                     | 2.243          | -0.272                       | 0.074                     |
| TaMIP 24 h      | 2.452          | 0.514                        | 0.264                     | 2.857          | 0.359                        | 0.129                     | 0.312          | 0.102                        | 0.010                     |
| TaHKT 0 h       | 3.725          | 0.634                        | 0.401                     | 2.371          | -0.327                       | 0.107                     | 1.426          | 0.217                        | 0.047                     |
| TaHKT 12 h      | 3.613          | 0.624                        | 0.389                     | 0.701          | -0.178                       | 0.032                     | 1.802          | 0.244                        | 0.059                     |
| TaHKT 24 h      | 5.869          | 0.795                        | 0.632                     | 3.258          | 0.383                        | 0.147                     | 0.029          | -0.031                       | 0.001                     |
| TaGSK1 0 h      | 6.420          | 0.832                        | 0.692                     | 0.285          | 0.113                        | 0.013                     | 0.259          | 0.093                        | 0.009                     |
| TaGSK1 12 h     | 0.276          | -0.173                       | 0.030                     | 5.469          | 0.496                        | 0.246                     | 0.352          | 0.108                        | 0.012                     |
| TaGSK1 24 h     | 0.014          | -0.039                       | 0.002                     | 14.336         | 0.804                        | 0.646                     | 1.301          | 0.207                        | 0.043                     |
| TaP5CS 0 h      | 1.331          | 0.379                        | 0.143                     | 0.056          | 0.050                        | 0.003                     | 8.883          | 0.541                        | 0.293                     |
| TaP5CS 12 h     | 1.231          | -0.364                       | 0.133                     | 7.046          | 0.563                        | 0.317                     | 3.149          | -0.322                       | 0.104                     |
| TaP5CS 24 h     | 2.767          | -0.546                       | 0.298                     | 5.765          | 0.510                        | 0.260                     | 0.183          | 0.078                        | 0.006                     |
| TaMYB 0 h       | 8.513          | 0.958                        | 0.917                     | 0.101          | -0.067                       | 0.005                     | 0.029          | -0.031                       | 0.001                     |
| TaMYB 12 h      | 1.019          | 0.331                        | 0.110                     | 0.623          | 0.168                        | 0.028                     | 7.877          | -0.510                       | 0.260                     |
| TaMYB 24 h      | 1.049          | 0.336                        | 0.113                     | 5.061          | 0.477                        | 0.228                     | 3.690          | 0.349                        | 0.122                     |
| Eigenvalue      |                | 10.773                       |                           |                | 4.405                        |                           |                | 3.300                        |                           |
| Variability (%) |                | 35.911                       |                           |                | 15.012                       |                           |                | 10.999                       |                           |
| Cumulative (%)  |                | 35.911                       |                           |                | 50.924                       |                           |                | 61.923                       |                           |
