# Supplementary material for: The TaGSK1, TaSRG, TaPTF1, and TaP5CS Gene Transcripts Confirm Salinity Tolerance by Increasing Proline Production in Wheat (Triticum aestivum L.)
Source: MDPI journal article supplement (doi:10.3390/plants11233401), 2022-12-06
Supplement: s1 [file s1]

**Table S2. Amino acid sequences of TaPTF1, TaDHN, TaSRG, TaSC, TaPIMP1, TaMIP, TaHKT1;4, TaGSK, TaP5CS, and TaMYB genes**

| Gene name       | Accession Number | Sequence                                                                                                                                                                                                                                                                                                                                                                                                                                                                                                                                                                                                                                                                                                                                                                                           |
|-----------------|------------------|----------------------------------------------------------------------------------------------------------------------------------------------------------------------------------------------------------------------------------------------------------------------------------------------------------------------------------------------------------------------------------------------------------------------------------------------------------------------------------------------------------------------------------------------------------------------------------------------------------------------------------------------------------------------------------------------------------------------------------------------------------------------------------------------------|
| <i>TaPTF1</i>   | ABI95371.1       | MDYNSGFFPSWPGNSASENYSFVDGSVESYAEEGSMPPTGYFRARSNQNLTFDEHEQNPAMLANGCLPY<br>NTQTDLLSGEILSEDKHSNSLMELPQLQNNGLSQSNLIIPPGLTQCTSTPGTFDLQLDTPGLLELPHALSS<br>SIESNGSEVSAFLADVHAVSSASTLCSTFQNVPSYMEPVSLAEAFSFGQIQNAAMFNNTSHSNGNLSVFDE<br>ATMASLHDSKEFLSGSISSEFGTAEQSQLAGSGLKAEQQEQNAMCNIPLPFASGSQMAVSEAQGAMIPSKI<br>SSTMHNNKSEYPVPISHSADAQNKANSANGNSASAKPRARARRGQATDPHSIAERLRREKISERMKNLQD<br>LVPNSNKADKSSMLDEIIDYVKFLQLQVKVLCMSRLGAPGAVLPLLAESQTEGRSNSPLSSPTASQGLLD<br>AAGPEDSLVFEQEVIKLMETSITNAMQYLQNKGLCLMPIALASAINQKGTSAAIIPPER                                                                                                                                                                                                                                                                          |
| <i>TaDHN</i>    | CAY85463.1       | MEHQGHGAGEKKGVVESITEKLPGGHGDHQQATGGTYGQQGHAGVTGENIKEKLPGGHGDHQQTTGMTGS<br>ETHATTATTDGNYGKSGHTGTDGTGENKSIMDKIKDKLPGQH                                                                                                                                                                                                                                                                                                                                                                                                                                                                                                                                                                                                                                                                               |
| <i>TaSRG</i>    | ABG75754.1       | MQGEVEQQTPMQMVLRVKHPSSLSSGSEEASEGEGSSRSALSVFKAKEEQIERKKMEVRDVKVFAQLGRVE<br>EESKRLAFIRQELEGMA DPTKEVESIQRRIDTVNRQLKPLSKSCVKKEKEYKEILEAYNEKSKEKAILV<br>NRLIELVSESERMRMKLEELNKTVDLSLY                                                                                                                                                                                                                                                                                                                                                                                                                                                                                                                                                                                                                 |
| <i>TaSC</i>     | AAY26392.1       | MENLAMLWGIIGPGVAGALFGAGWFWVDVAVCSAVQVSFIHYLPGIFASLAALMFNCV DKAIGNDYYS<br>SYGDDSEWRVKLWLFAVYVVSFVCLAGSVGLLVQDALTDKGPSVMTGVAGVLQCVFVLISGLTYWTCHE<br>D                                                                                                                                                                                                                                                                                                                                                                                                                                                                                                                                                                                                                                                |
| <i>TaMIP</i>    | ABF66147.1       | MSVTSNTPTRANSRVNYSNEI HDLSTVQDGAPSLAPSMYYQEKSFADFFPHLGKKVISEMVATFLLV FV<br>TCGAASIYGADVTRVSQLGQSVVGGLIVTVMYIATGHISGAHMNPVATLSFACFRHFPWIQVPFYWAAQF<br>TGAMCAAFVLRVAVLHPITVLGTTPTGPHWHALVIEIIVTFNMMFITCAVATDSRAVGELAGLAVGSAVC<br>ITSIFAGPVSGGSMNPARTLAPAVASGVYTG LWIYFLGPVIGT LSGAVVYTYIRFEEEPSVKDGPQKLSS<br>FKLRRLQSQRSMVDEFDHY                                                                                                                                                                                                                                                                                                                                                                                                                                                                     |
| <i>TaPIMP1</i>  | ABV59990.1       | MTAGLQLGVIGSLALSVASSVAIVICNKALISTLGFPPATTLTSHWLMVTYCTLHVAQR LHFFEPKAIDG<br>HTVILFGFLNGTSIGLLNLSLGFNSIGFYQMTKLAIIPFTVLEITIFLNKRFSETIKLSLMVLLLGVGIA<br>SVTDLELNLLGSVLSGLAIATTCVGQILTNITQKKLKVSSTQLLYQSAPYQAAILFATGPFVDRLLTNRS<br>VFAHKYTPVVGFIILSCLIAVSVNFSTFLVIGTTSPTVYQVLGHLKTCVLVSFGYTL LHDFFT MKNILG<br>ILVAIFGMALYSFFSVRESKKKSTNDALPVSQMPDKETEP LLATKDGS DIKKANGVSHGC                                                                                                                                                                                                                                                                                                                                                                                                                           |
| <i>TaHKT1;4</i> | CDN24623.1       | YLPPTYTWFFFEESSGVKDHPTEETQGSRLKSTALSQLSYLAIFI I AICVTERENLEENPLNFSLLSIV<br>VEVVRQAPSANQESLKTNNKYDCNLVLPALLVSFMEADIF                                                                                                                                                                                                                                                                                                                                                                                                                                                                                                                                                                                                                                                                                |
| <i>TaGSK1</i>   | AAM77397.1       | MGNMSIRDDRPEDIVVNGNGTEPGHIIVTSIEGRNGQAKQTI SYMAERVVGN SGFTVFQAKCLETGET<br>VAIKKVLQDKRYKNRELQTMRLVDHPNVVALKHCFFSKTEKEELYLNLVLEYVPETAHRVIKHYNMKNQR<br>MPLIYAKLYMYQICRSLAYIHNSIGVCHRDIKPQNLLVNPHTHQLKLCDFGSAKVLVKGEPNISYICSRY<br>YRAPELIFGATEYTTAIDVWSAGCVLAELLLGQPIFPGDSGVDQLVEIIKVLGTP TREEIKCMNP NYTEF<br>KFPQIKAHPPWHKIFHKRMPAEAVDLVSRLQYSPSLRSTALEALIHPPFDEL RDPNTRLNGRFLPPLFN<br>FKPHELKGVPM DILVKLIPEHARKNCA FVGW                                                                                                                                                                                                                                                                                                                                                                              |
| <i>TaP5CS</i>   | AIZ77473.1       | MAGADLNRSFIKDVKRII IKVGTAVITRNDGRLALGRIGALCEQVKDLNAQGYEIVMTSGAVGVGRQRL<br>RYRKLVNSSFADLQKPQMELDGKACA AVGQSGLMALYDMLFTQLDVS SSQLLVTDSDFDNSNFRERLRET<br>VESLLELRVPIPIFNENDAISTRKAPYEDSSGIFWDNDSLAGLLALELKADLLVLLSDVDGLYSGPPSEPS<br>SKLIHTYIKEKHYHEITFGDKSRVGRGGM TAKVQAAVWASTGGVPVVITSGCASQSLVKVL RGEKIGTLF<br>HKNASLWEP SKDTSVREMAVAARDCSRRLQNL TSEERKKILVDVADALEANEDLIRSENEADLAAAHEAG<br>YESALVSR LTLKPGKIASLAKSVRTL ANMEDPINEILK RTEVADGLVLEKTS CPLGVLLIIFESRPDALV<br>QIASLAIRSGNGLLLKGGKEAMRSNAI LHKVITNAIPNNVGEKLI GLITTRDEIADLLKHDDVIDLVI PR<br>GSNKLVAQIKSSTKI PVLGHADGVCHVYIDKSADMDMAKRIVMDAKIDYPACNAMETLLVHKDLMKTPE<br>LNDILVALKTAGVNLYCGPVAHKVLGYPKADSLHLEYSSMACTVEIVDDVQSAIDHIHRYGSAHTDCVVT<br>TDDKVAETFLRQVDSAAVLYNASTRFSDGARFGLGAEVGISTGRIHARGPVGVEGLLTT RWLLRGKGQV<br>NGDKDVEYTHKSLPLQ |
| <i>TaMYB</i>    | AAU06822.1       | MMYHAKKFSVPFAPQRAQNSEHVS NIGAFGGSNISNPANPVGSGKQRLRWTS DLHSRFVDAI AQLGGPDR<br>ATPKGVLTVMGVPGIT IYHVKSHLQYRLAKYI PESPAEGSKDEKKDSSDSFSNAD SAPGSQINEALKMQ<br>MEVQKRLHEQLEVKQLQLRIEAQ GKYLQMIIEEQQLKGSLEGSEERKLSHSPPTLDDY PDSIQSPKK<br>PRLDDLSTDAVRGVTQPGFESH LIGPWQDELCPKTNICDPAFQVDEFKANPGLSKS                                                                                                                                                                                                                                                                                                                                                                                                                                                                                                        |
